# Supplementary material for: Prediction of Strength Properties of Filling Packets in Selected Cooling Towers
Source: MDPI journal article supplement (doi:10.3390/polym13213840), 2021-11-06
Supplement: s1 [file s1]

## Supplementary Material

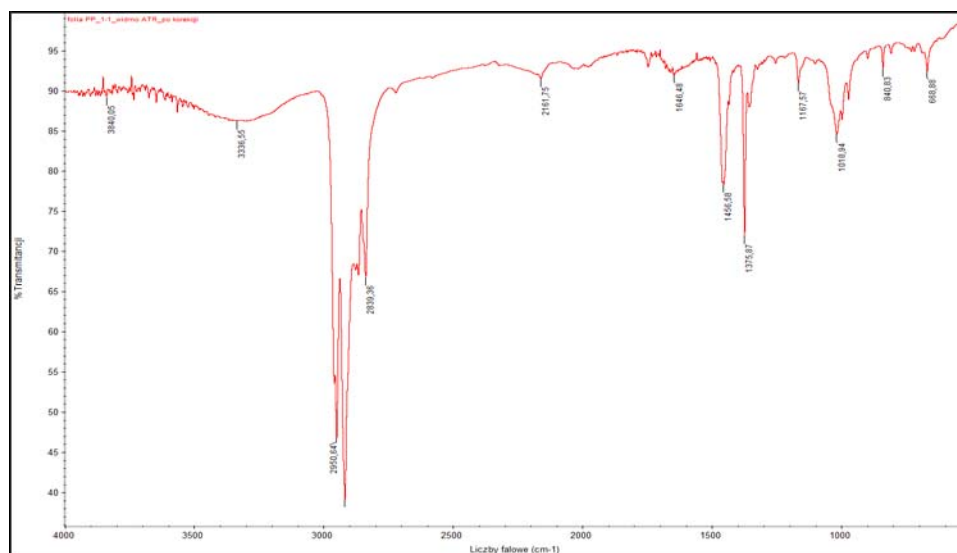

Figure S1. The spectrum of CT1\_LS

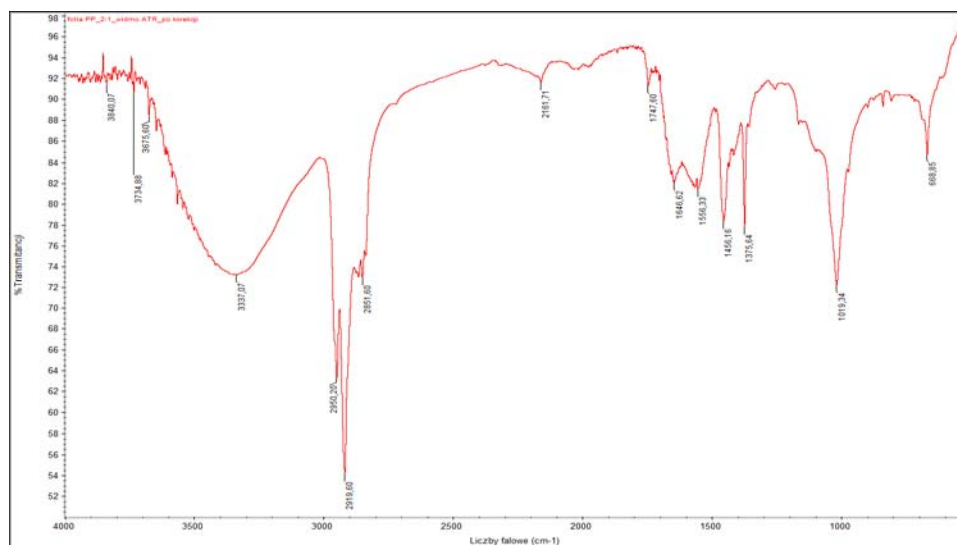

Figure S2. The spectrum of CT1\_C

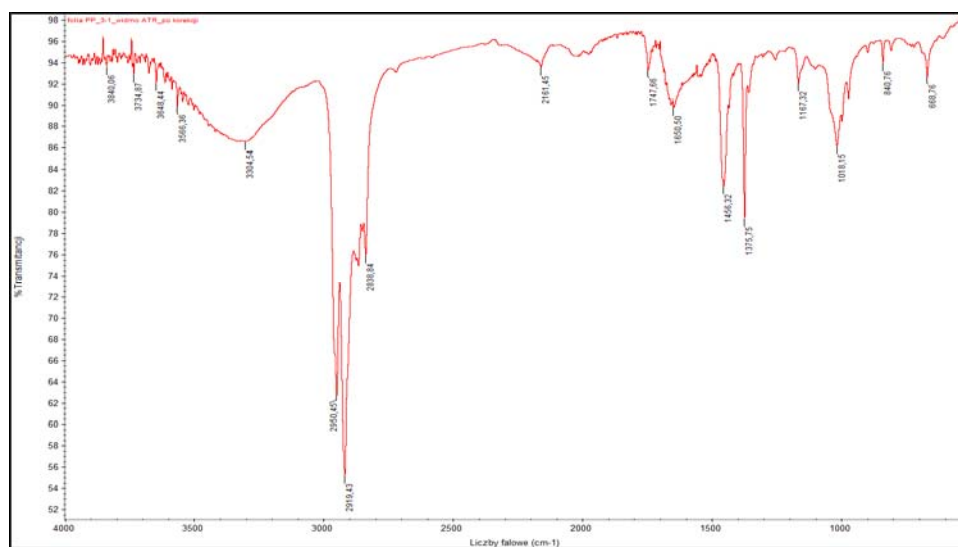

Figure S3. CT1\_RS spectrum

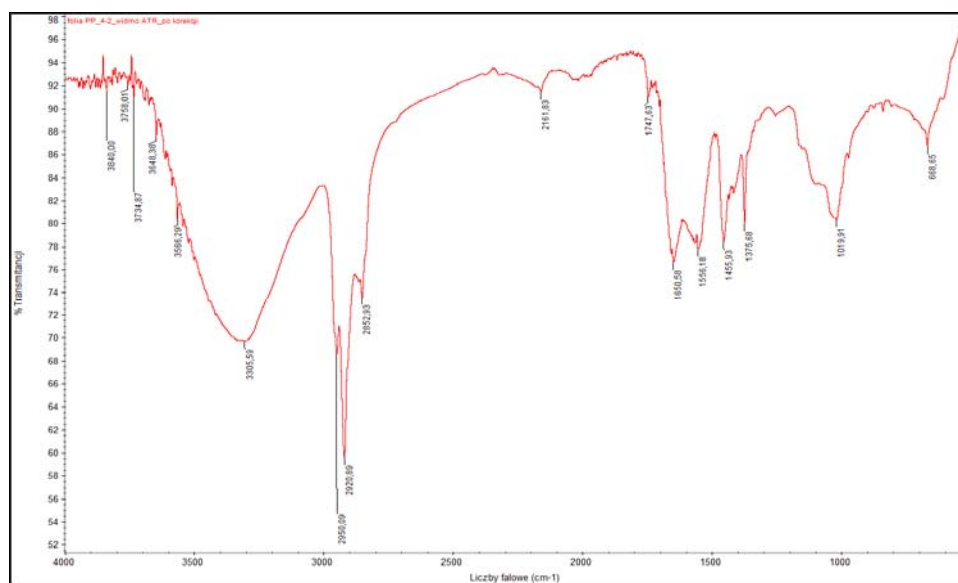

Figure S4. The spectrum of CT2\_C2

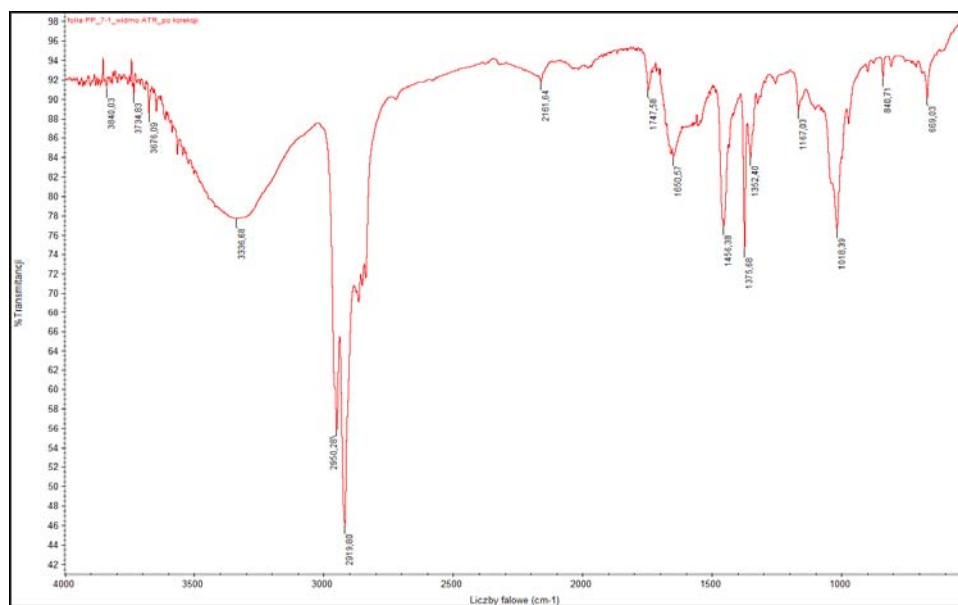

Figure S5. CT2\_RS spectrum

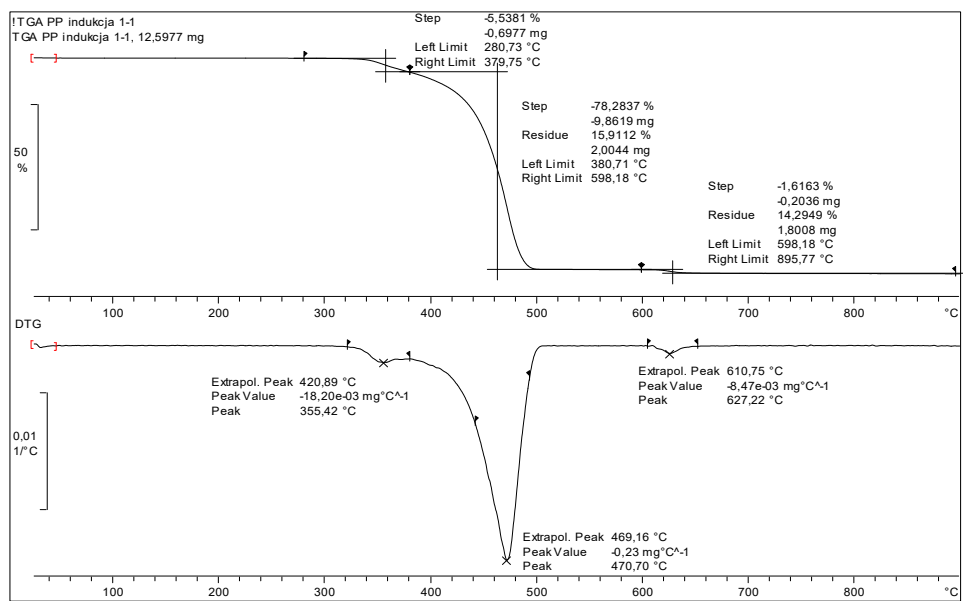

Lab: METTLER

STAR® SW 8.10

Figure S6. Dependence of sample mass on temperature increasing with constant velocity in the TGA CT1\_LS tests

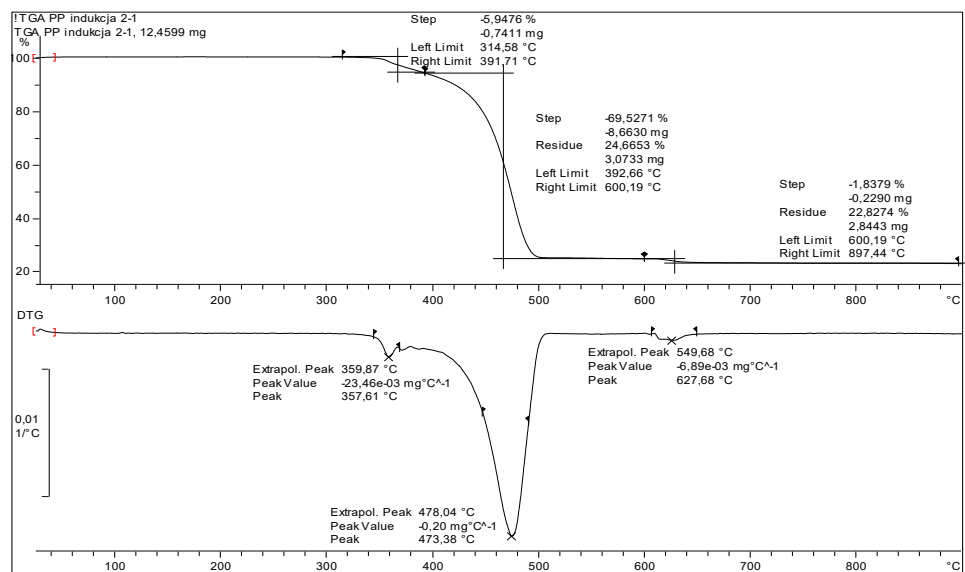

Lab: METTLER

STAR® SW 8.10

Figure S7. Dependence of sample mass on temperature increasing with constant velocity in the TGA CT1\_C tests

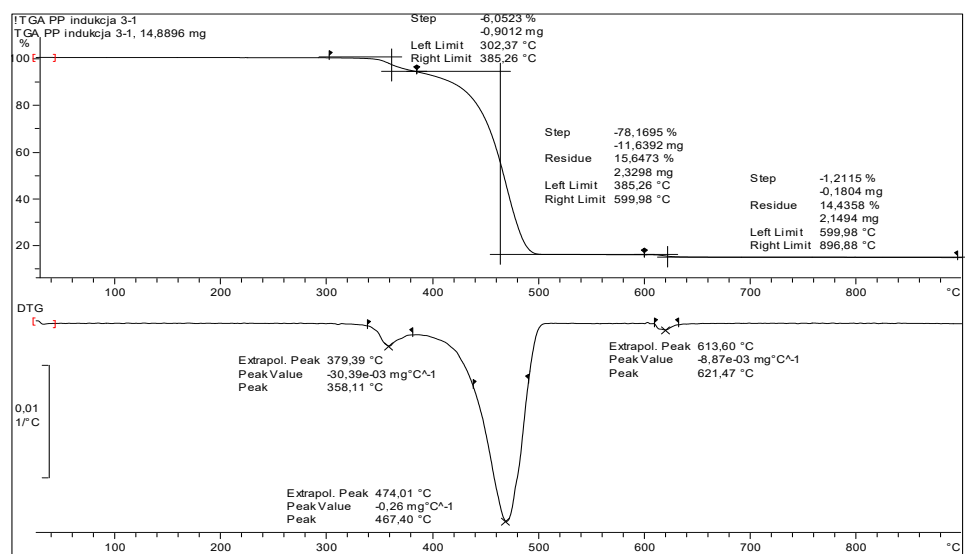

Lab: METTLER

STAR® SW 8.10

Figure S8. Dependence of the sample mass on the temperature increasing with a constant speed in the TGA CT1\_RS tests

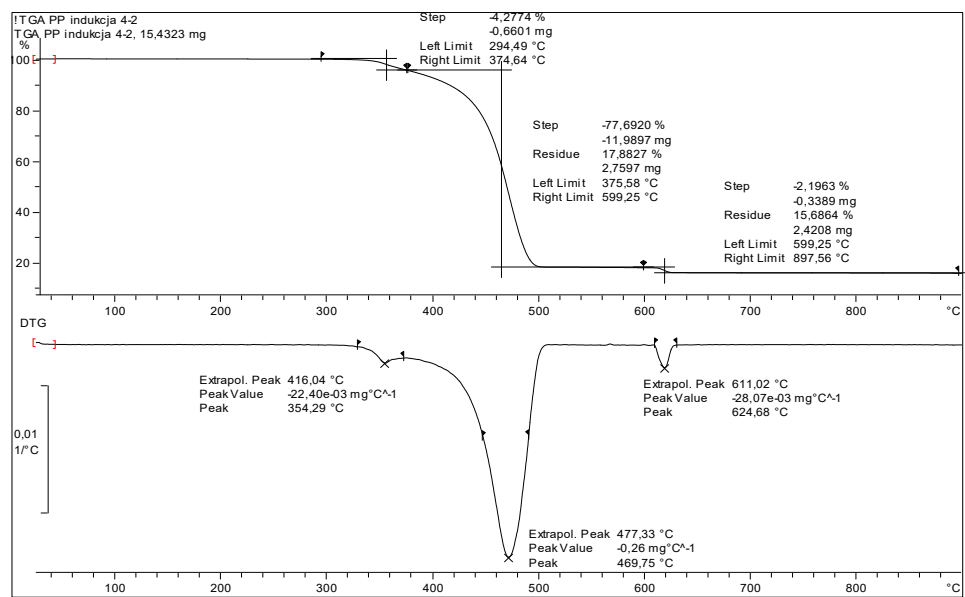

Lab: METTLER

STAR® SW 8.10

Figure S9. Dependence of sample mass on temperature increasing with constant velocity in TGA CT2\_C tests

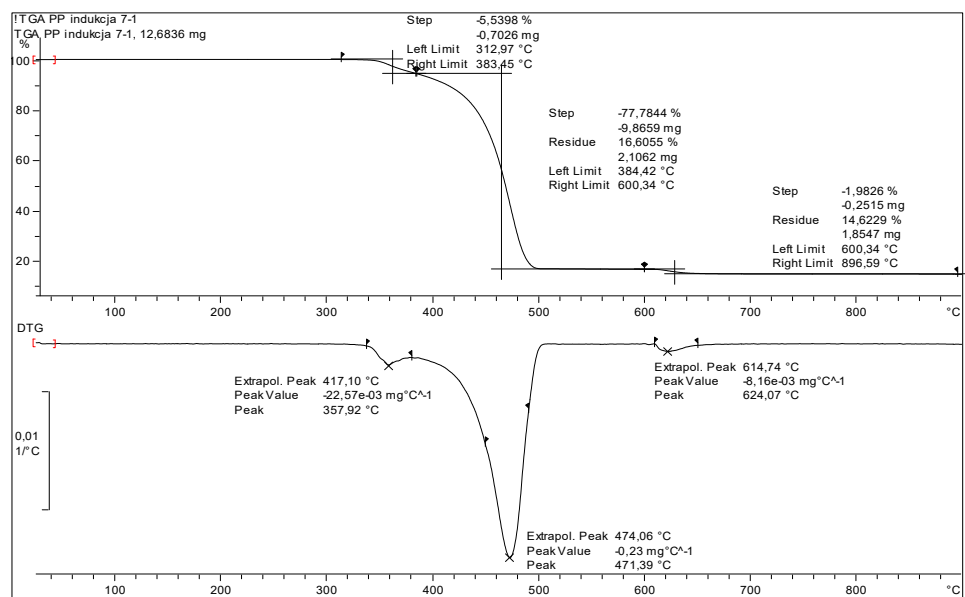

Lab: METTLER

STAR® SW 8.10

Figure S10. Dependence of sample mass on temperature increasing with constant velocity in TGA CT2\_RS tests
